# Supplementary material for: Simple Estimation of Incident HIV Infection Rates in Notification Cohorts Based on Window Periods of Algorithms for Evaluation of Line-Immunoassay Result Patterns
Source: PubMed Central journal article supplement (PMC3753319; doi:10.1371/journal.pone.0071662), 2013-08-26
Supplement: pone.0071662.s001.pdf [file pone.0071662.s001.pdf]

**Supporting Information S1 – Definitions and diagnostic performance of Inno-Lia algorithms for incident HIV-1 infection (adapted from [19])**

| Alg # | Definition                                                                                                                  | % Sensitivity | % Specificity |
|-------|-----------------------------------------------------------------------------------------------------------------------------|---------------|---------------|
| 2     | if sgp120≤1<br>then RECENT<br>else older                                                                                    | 54.46         | 95.41         |
| 3     | if gp41≤0.5<br>then RECENT<br>else older                                                                                    | 20.30         | 100.0         |
| 3.1   | if gp41≤1<br>then RECENT<br>else older                                                                                      | 23.53         | 100.0         |
| 3.2   | if gp41≤2<br>then RECENT<br>else older                                                                                      | 44.02         | 98.11         |
| 4     | if p31=0<br>then RECENT<br>else older                                                                                       | 60.15         | 92.70         |
| 4.1   | if p31≤0.5<br>then RECENT<br>else older                                                                                     | 63.95         | 91.89         |
| 5     | if p24≤0<br>then RECENT<br>else older                                                                                       | 26.00         | 95.54         |
| 6     | if p17=0<br>then RECENT<br>else older                                                                                       | 40.80         | 90.80         |
| 7     | if sgp120+gp41+p31≤4<br>then RECENT<br>else older                                                                           | 54.08         | 98.38         |
| 8     | if gp41≤0.5<br>OR (sgp120+gp41+p31≤4)<br>OR (sgp120+gp41+p31+p24+p17≤ 6.5)<br>then RECENT<br>else older                     | 54.65         | 96.75         |
| 8.1   | if gp41≤0.5<br>OR (sgp120+gp41+p31≤4)<br>OR ((sgp120+gp41+p31+p24+p17≤ 6.5) AND p31≤1)<br>then RECENT<br>else older         | 54.65         | 96.76         |
| 9     | if sgp120+gp41≤4 AND p31=0<br>then RECENT<br>else older                                                                     | 52.75         | 98.38         |
| 10    | if p31=0 AND p24 ≥ 2<br>then RECENT<br>else older                                                                           | 30.93         | 95.27         |
| 11    | if (sgp120+gp41≤2.5)<br>OR (sgp120+gp41+p31+p24+p17≤6.5)<br>OR (p31=0 AND p24 ≥ 2)<br>then RECENT<br>else older             | 61.48         | 93.37         |
| 11.1  | if (sgp120+gp41≤2.5)<br>OR ((sgp120+gp41+p31+p24+p17≤6.5) AND p31≤1)<br>OR (p31=0 AND p24 ≥ 2)<br>then RECENT<br>else older | 61.48         | 93.51         |

|      |                                                                                                                                                                                   |       |       |
|------|-----------------------------------------------------------------------------------------------------------------------------------------------------------------------------------|-------|-------|
| 11.2 | if (sgp120+gp41≤2.5)<br>OR ((sgp120+gp41+p31+p24+p17≤6.5) AND p31≤1 AND p17≤p24)<br>OR (p31=0 AND p24 ≥ 2)<br>then RECENT<br>else older                                           | 61.48 | 94.05 |
| 12   | if (p24 ≥ 2 AND p31=0)<br>OR (gp41≤.5)<br>OR (sgp120+gp41+p31≤4)<br>OR sgp120+gp41+p31+p24+p17≤6.5)<br>then RECENT<br>else older                                                  | 61.67 | 93.37 |
| 12.1 | if (p24 ≥ 2 AND p31=0)<br>OR (gp41≤.5)<br>OR (sgp120+gp41+p31≤4)<br>OR (p31≤1 AND (sgp120+gp41+p31+p24+p17≤6.5))<br>then RECENT<br>else older                                     | 61.67 | 93.38 |
| 13   | if (sgp120+gp41≤4 AND p31=0)<br>OR (p31=0 AND p24 ≥ 2)<br>then RECENT<br>else older                                                                                               | 59.77 | 95.00 |
| 13.1 | if gp41≤2<br>OR (p31=0 AND p24 ≥ 2)<br>then recent<br>else older                                                                                                                  | 60.34 | 93.92 |
| 14   | if (sgp120+gp41+p31+p24+p17≤6.5 AND p31≤1)<br>then RECENT<br>else older                                                                                                           | 45.92 | 97.84 |
| 15   | if (sgp120≤1 AND p31≤1)<br>OR (gp41≤2 AND p31≤1)<br>OR (p17 ≥ 2 AND p31=0)<br>OR (p31=0 AND p24 ≥ 2)<br>then RECENT<br>else older                                                 | 62.24 | 94.32 |
| 15.1 | if (sgp120≤1 AND p31≤1 AND p17≤p24)<br>OR (gp41≤2 AND p31≤1 AND p17≤p24)<br>OR (p17 ≥ 2 AND p31=0 AND p17≤p24)<br>OR (p31=0 AND p24 ≥ 2 AND p17≤p24)<br>then RECENT<br>else older | 61.67 | 95.14 |
| 16   | if (sgp120≤1 AND (p31+p24+p17≤2.5))<br>OR (gp41≤1 )<br>OR (p31≤0.5 AND (sgp120+gp41+p24+p17≥15))<br>OR (p24=0 AND gp41≤2)<br>OR (p24 ≥ 3 AND p31=0)<br>then RECENT<br>else older  | 50.47 | 96.62 |
| 17   | if (sgp120 * gp41)≤2<br>then RECENT<br>else older                                                                                                                                 | 50.09 | 98.24 |
| 18   | if (sgp120 * gp41≤1)<br>OR (p24+p31=0)<br>then RECENT<br>else older                                                                                                               | 46.11 | 98.24 |
