# Supplementary material for: Simple Estimation of Incident HIV Infection Rates in Notification Cohorts Based on Window Periods of Algorithms for Evaluation of Line-Immunoassay Result Patterns
Source: PubMed Central journal article supplement (PMC3753319; doi:10.1371/journal.pone.0071662), 2013-08-26
Supplement: pone.0071662.s002.pdf [file pone.0071662.s002.pdf]

|    | A                                                                                     | B                                               | C       | D                  | E                 | F                 | G                 | H                 | I                 | J                | K                 | L                 | M                               | N            | O   | P     |
|----|---------------------------------------------------------------------------------------|-------------------------------------------------|---------|--------------------|-------------------|-------------------|-------------------|-------------------|-------------------|------------------|-------------------|-------------------|---------------------------------|--------------|-----|-------|
| 1  | <b>Supporting Information S2: IIR-W calculations based on time as a linear entity</b> |                                                 |         |                    |                   |                   |                   |                   |                   |                  |                   |                   |                                 |              |     |       |
| 2  |                                                                                       |                                                 |         |                    |                   |                   |                   |                   |                   |                  |                   |                   |                                 |              |     |       |
| 3  |                                                                                       |                                                 |         |                    |                   |                   |                   |                   |                   |                  |                   |                   |                                 |              |     |       |
| 4  | Calculations relating to Table 2 of the paper                                         |                                                 |         |                    |                   |                   |                   |                   |                   |                  |                   |                   |                                 |              |     |       |
| 5  |                                                                                       |                                                 |         |                    |                   |                   |                   |                   |                   |                  |                   |                   |                                 |              |     |       |
| 6  |                                                                                       |                                                 |         |                    |                   |                   |                   |                   |                   |                  |                   |                   |                                 |              |     |       |
| 7  |                                                                                       | Linear regression curve parameters (y = ax + b) |         | Full window (days) |                   |                   | 50% window (days) |                   |                   | 0% window (days) |                   |                   | Regression curve specifications |              |     |       |
| 8  | Algorithm                                                                             | b                                               | a       | x for y=0%         | Lower Limit 95%CI | Upper Limit 95%CI | x for y=50%       | Lower Limit 95%CI | Upper Limit 95%CI | x for y=100%     | Lower Limit 95%CI | Upper Limit 95%CI | Datapoints selected             | N datapoints | R^2 |       |
| 9  | BED                                                                                   |                                                 |         | 153.0              |                   |                   |                   |                   |                   |                  |                   |                   |                                 |              |     |       |
| 10 | 1                                                                                     | 2                                               | 107.071 | -1.032             | 103.8             | 92.0              | 121.7             | 55.3              | 49.5              | 62.5             | 6.9               | 0.0               | 15.0                            | 3-6          | 4   | 0.933 |
| 11 | 2                                                                                     | 3                                               | 107.456 | -2.348             | 45.8              | 33.0              | 114.0             | 24.5              | 0.0               | 39.5             | 3.2               | 0.0               | 17.5                            | 1-4          | 4   | 0.938 |
| 12 | 3                                                                                     | 3.1                                             | 108.831 | -2.257             | 48.2              | 36.0              | 94.0              | 26.1              | 10.0              | 38.0             | 3.9               | 0.0               | 16.0                            | 1-4          | 4   | 0.953 |
| 13 | 4                                                                                     | 3.2                                             | 94.406  | -0.990             | 95.4              | 67.0              | 85.0              | 44.9              | 37.0              | 44.5             | 5.7               | 1.0               | 11.0                            | 2-6          | 5   | 0.963 |
| 14 | 5                                                                                     | 4                                               | 119.663 | -0.989             | 121.0             | 99.0              | 177.5             | 70.4              | 62.0              | 86.0             | 19.9              | 0.0               | 34.5                            | 3-6          | 4   | 0.977 |
| 15 | 6                                                                                     | 4.1                                             | 123.961 | -0.953             | 130.1             | 94.0              | 570.0             | 77.6              | 62.0              | 204.0            | 25.1              | 0.0               | 44.5                            | 3-6          | 4   | 0.926 |
| 16 | 7                                                                                     | 5                                               | 109.067 | -2.193             | 49.7              | 38.0              | 86.0              | 26.9              | 14.0              | 37.0             | 4.1               | 0.0               | 16.5                            | 1-4          | 4   | 0.961 |
| 17 | 8                                                                                     | 6                                               | 104.317 | -1.405             | 74.2              | 63.0              | 96.0              | 38.7              | 32.0              | 46.0             | 3.1               | 0.0               | 14.0                            | 1-5          | 5   | 0.963 |
| 18 | 9                                                                                     | 7                                               | 113.098 | -1.074             | 105.3             | 92.0              | 133.0             | 58.8              | 52.0              | 65.5             | 12.2              | 0.0               | 26.0                            | 3-6          | 4   | 0.987 |
| 19 | 10                                                                                    | 8                                               | 109.320 | -0.991             | 110.3             | 90.0              | 176.0             | 59.9              | 48.0              | 73.0             | 9.4               | 0.0               | 28.5                            | 3-6          | 4   | 0.968 |
| 20 | 11                                                                                    | 8.1                                             | 109.320 | -0.991             | 110.3             | 90.0              | 176.0             | 59.9              | 48.0              | 73.0             | 9.4               | 0.0               | 28.5                            | 3-6          | 4   | 0.968 |
| 21 | 12                                                                                    | 9                                               | 108.484 | -1.047             | 103.6             | 80.0              | 250.0             | 55.9              | 32.0              | 74.0             | 8.1               | 0.0               | 32.5                            | 3-6          | 4   | 0.941 |
| 22 | 13                                                                                    | 11                                              | 120.440 | -0.945             | 127.4             | 109.0             | 162.0             | 74.5              | 67.0              | 74.0             | 21.6              | 5.5               | 32.5                            | 3-6          | 4   | 0.989 |
| 23 | 14                                                                                    | 11.1                                            | 120.440 | -0.945             | 127.4             | 109.0             | 162.0             | 74.5              | 67.0              | 74.0             | 21.6              | 5.5               | 32.5                            | 3-6          | 4   | 0.989 |
| 24 | 15                                                                                    | 11.2                                            | 120.440 | -0.945             | 127.4             | 109.0             | 162.0             | 74.5              | 67.0              | 74.0             | 21.6              | 5.5               | 32.5                            | 3-6          | 4   | 0.989 |
| 25 | 16                                                                                    | 12                                              | 120.500 | -0.932             | 129.3             | 106.0             | 185.0             | 75.6              | 66.0              | 93.0             | 22.0              | 0.0               | 35.0                            | 3-6          | 4   | 0.980 |
| 26 | 17                                                                                    | 12.1                                            | 120.500 | -0.932             | 129.3             | 106.0             | 186.0             | 75.6              | 66.0              | 93.0             | 22.0              | 0.0               | 35.0                            | 3-6          | 4   | 0.980 |
| 27 | 18                                                                                    | 13                                              | 119.663 | -0.989             | 121.0             | 99.5              | 178.0             | 70.4              | 62.5              | 86.0             | 19.9              | 0.0               | 34.5                            | 3-6          | 4   | 0.977 |
| 28 | 19                                                                                    | 13.1                                            | 124.596 | -1.011             | 123.2             | 92.0              | 380.0             | 73.8              | 60.0              | 140.0            | 24.3              | 0.0               | 43.0                            | 3-6          | 4   | 0.936 |
| 29 | 20                                                                                    | 14                                              | 111.680 | -1.441             | 77.5              | 69.0              | 91.0              | 42.8              | 37.0              | 47.0             | 8.1               | 0.0               | 16.0                            | 2-5          | 4   | 0.992 |
| 30 | 21                                                                                    | 15                                              | 125.690 | -1.031             | 121.9             | 103.0             | 160.0             | 73.4              | 66.0              | 85.0             | 24.9              | 5.0               | 35.0                            | 3-6          | 4   | 0.986 |
| 31 | 22                                                                                    | 15.1                                            | 125.629 | -1.044             | 120.3             | 112.5             | 133.0             | 72.4              | 69.0              | 75.0             | 24.5              | 18.0              | 30.0                            | 3-6          | 4   | 0.997 |
| 32 | 23                                                                                    | 16                                              | 95.383  | -0.870             | 109.6             | 88.0              | 184.0             | 52.2              | 35.0              | 63.0             | 5.3               | 0.0               | 19.5                            | 3-6          | 4   | 0.965 |
| 33 | 24                                                                                    | 17                                              | 103.129 | -1.039             | 99.3              | 82.0              | 140.0             | 51.1              | 40.0              | 62.5             | 3.0               | 0.0               | 20.0                            | 2-6          | 5   | 0.943 |
| 34 | 25                                                                                    | 18                                              | 93.987  | -0.958             | 98.1              | 77.0              | 163.0             | 45.9              | 28.0              | 59.0             | 6.3               | 0.0               | 17.0                            | 2-6          | 5   | 0.912 |
| 35 |                                                                                       | mean                                            | 112.7   | -1.2               | 104.4             |                   |                   | 58.2              |                   |                  | 13.4              |                   |                                 |              |     | 0.965 |
| 36 |                                                                                       | SD                                              | 9.7     | 0.4                | 26.2              |                   |                   | 17.0              |                   |                  | 8.5               |                   |                                 |              |     | 0.024 |
| 37 |                                                                                       | %CV                                             | 8.6     | -36.8              | 25.1              |                   |                   | 29.3              |                   |                  | 63.6              |                   |                                 |              |     | 2.4   |
| 38 |                                                                                       | lower limit 95%CI                               | 108.9   | -1.3               | 94.1              |                   |                   | 51.5              |                   |                  | 10.1              |                   |                                 |              |     | 0.955 |
| 39 |                                                                                       | upper limit 95%CI                               | 116.5   | -1.0               | 114.6             |                   |                   | 64.9              |                   |                  | 16.8              |                   |                                 |              |     | 0.974 |

|  |   |   |   |   |   |   |   |   |   |   |    |    |    |    |    |    |    |    |    |
|--|---|---|---|---|---|---|---|---|---|---|----|----|----|----|----|----|----|----|----|
|  | Q | R | S | T | U | V | W | X | Y | Z | AA | AB | AC | AD | AE | AF | AG | AH | AI |
|--|---|---|---|---|---|---|---|---|---|---|----|----|----|----|----|----|----|----|----|

IIR-W calculations relating to Fig. 3 of the paper. IIR-W figures in red indicate a significant difference com

Calculations relating to Table 3 of the paper

Cohort A; Baseline; June 2005 — May 2006; N = 748

Cohort B; 2008; N = 667

|    | ALG #             | Specificity (%) | Nonadjusted IIR-W Calculation |                  |                      |                   |                   | IIR-W adjusted for specificity |                |                   | N ruled older | N ruled incident  | N estimated incident | Adjusted IIR-W | IIR-W, in % of baseline |                   |
|----|-------------------|-----------------|-------------------------------|------------------|----------------------|-------------------|-------------------|--------------------------------|----------------|-------------------|---------------|-------------------|----------------------|----------------|-------------------------|-------------------|
|    |                   |                 | N ruled older                 | N ruled incident | N estimated incident | Lower Limit 95%CI | Upper Limit 95%CI | Raw IIR-W                      | Adjusted IIR-W | Lower Limit 95%CI |               |                   |                      |                |                         | Upper Limit 95%CI |
| 8  | BED               | 80.1            | 486                           | 262              | 625                  |                   |                   | 0.836                          | 0.669          |                   |               |                   |                      |                |                         |                   |
| 10 | 2                 | 95.4            | 643                           | 105              | 369                  | 315               | 417               | 0.494                          | 0.471          | 0.402             | 0.531         | 549               | 118                  | 396            | 0.594                   | 126.0             |
| 11 | 3                 | 100.0           | 709                           | 39               | 311                  | 125               | 431               | 0.416                          | 0.416          | 0.167             | 0.577         | 630               | 37                   | 295            | 0.442                   | 106.4             |
| 12 | 3.1               | 100.0           | 704                           | 44               | 333                  | 171               | 446               | 0.445                          | 0.445          | 0.228             | 0.596         | 622               | 45                   | 341            | 0.511                   | 114.7             |
| 13 | 3.2               | 98.1            | 664                           | 84               | 322                  | 361               | 458               | 0.430                          | 0.422          | 0.473             | 0.600         | 578               | 89                   | 334            | 0.501                   | 118.8             |
| 14 | 4                 | 92.7            | 618                           | 130              | 392                  | 267               | 479               | 0.524                          | 0.486          | 0.331             | 0.594         | 535               | 132                  | 369            | 0.553                   | 113.9             |
| 15 | 4.1               | 91.9            | 597                           | 151              | 424                  | 97                | 586               | 0.566                          | 0.521          | 0.119             | 0.720         | 522               | 145                  | 374            | 0.561                   | 107.7             |
| 16 | 5                 | 95.5            | 703                           | 45               | 330                  | 191               | 432               | 0.442                          | 0.422          | 0.244             | 0.552         | 611               | 56                   | 393            | 0.589                   | 139.6             |
| 17 | 6                 | 90.8            | 655                           | 93               | 457                  | 354               | 539               | 0.611                          | 0.555          | 0.429             | 0.654         | 560               | 107                  | 478            | 0.716                   | 129.0             |
| 18 | 7                 | 98.4            | 656                           | 92               | 319                  | 252               | 365               | 0.426                          | 0.419          | 0.332             | 0.480         | 558               | 109                  | 372            | 0.557                   | 132.9             |
| 19 | 8                 | 96.8            | 653                           | 95               | 314                  | 197               | 385               | 0.420                          | 0.407          | 0.255             | 0.498         | 554               | 113                  | 362            | 0.542                   | 133.4             |
| 20 | 8.1               | 96.8            | 654                           | 94               | 311                  | 195               | 381               | 0.416                          | 0.402          | 0.252             | 0.493         | 554               | 113                  | 362            | 0.542                   | 134.8             |
| 21 | 9                 | 98.4            | 660                           | 88               | 310                  | 128               | 402               | 0.414                          | 0.408          | 0.169             | 0.528         | 560               | 107                  | 371            | 0.556                   | 136.4             |
| 22 | 11                | 93.4            | 620                           | 128              | 367                  | 288               | 429               | 0.490                          | 0.458          | 0.360             | 0.535         | 531               | 136                  | 364            | 0.545                   | 119.2             |
| 23 | 11.1              | 93.4            | 620                           | 128              | 367                  | 288               | 429               | 0.490                          | 0.458          | 0.360             | 0.535         | 531               | 136                  | 364            | 0.545                   | 119.2             |
| 24 | 11.2              | 94.1            | 621                           | 127              | 364                  | 286               | 425               | 0.486                          | 0.457          | 0.360             | 0.535         | 531               | 136                  | 366            | 0.549                   | 120.1             |
| 25 | 12                | 93.4            | 618                           | 130              | 367                  | 256               | 448               | 0.491                          | 0.458          | 0.320             | 0.559         | 528               | 139                  | 366            | 0.549                   | 119.9             |
| 26 | 12.1              | 93.4            | 618                           | 130              | 367                  | 255               | 448               | 0.491                          | 0.458          | 0.318             | 0.559         | 528               | 139                  | 366            | 0.549                   | 119.9             |
| 27 | 13                | 95.0            | 625                           | 123              | 371                  | 252               | 451               | 0.496                          | 0.471          | 0.320             | 0.573         | 538               | 129                  | 370            | 0.554                   | 117.6             |
| 28 | 13.1              | 93.9            | 608                           | 140              | 415                  | 134               | 555               | 0.554                          | 0.521          | 0.169             | 0.697         | 532               | 135                  | 376            | 0.563                   | 108.1             |
| 29 | 14                | 97.8            | 675                           | 73               | 344                  | 293               | 386               | 0.460                          | 0.450          | 0.383             | 0.505         | 581               | 86                   | 396            | 0.594                   | 132.1             |
| 30 | 15                | 94.3            | 608                           | 140              | 419                  | 319               | 496               | 0.560                          | 0.529          | 0.403             | 0.626         | 523               | 144                  | 407            | 0.610                   | 115.3             |
| 31 | 15.1              | 95.1            | 611                           | 137              | 416                  | 376               | 444               | 0.556                          | 0.529          | 0.478             | 0.565         | 524               | 143                  | 413            | 0.619                   | 117.1             |
| 32 | 16                | 96.6            | 639                           | 109              | 363                  | 216               | 452               | 0.485                          | 0.469          | 0.279             | 0.584         | 556               | 111                  | 357            | 0.535                   | 114.2             |
| 33 | 17                | 98.2            | 659                           | 89               | 327                  | 232               | 396               | 0.438                          | 0.430          | 0.305             | 0.520         | 568               | 99                   | 358            | 0.536                   | 124.7             |
| 34 | 18                | 98.2            | 674                           | 74               | 275                  | 166               | 351               | 0.368                          | 0.362          | 0.218             | 0.461         | 575               | 92                   | 336            | 0.504                   | 139.4             |
| 35 | mean              | 95.7            |                               | 103.5            | 358.1                | 240.6             | 441.3             | 0.479                          | 0.457          | 0.307             | 0.563         | mean              | 111.8                | 371.3          | 0.557                   | 122.4             |
| 36 | SD                | 2.5             |                               | 31.9             | 44.3                 | 77.4              | 56.8              | 0.059                          | 0.047          | 0.097             | 0.063         | SD                | 30.7                 | 33.0           | 0.049                   | 9.9               |
| 37 | %CV               | 2.7             |                               | 30.8             | 12.4                 | 32.1              | 12.9              | 12.4                           | 10.3           | 31.4              | 11.2          | %CV               | 27.4                 | 8.9            | 8.9                     | 8.1               |
| 38 | lower limit 95%CI | 94.7            |                               | 91.0             | 340.8                | 210.3             | 419.0             | 0.456                          | 0.438          | 0.269             | 0.538         | lower limit 95%CI | 99.8                 | 358.4          | 0.537                   | 118.5             |
| 39 | upper limit 95%CI | 96.7            |                               | 116.0            | 375.5                | 271.0             | 463.5             | 0.502                          | 0.475          | 0.345             | 0.588         | upper limit 95%CI | 123.9                | 384.3          | 0.576                   | 126.3             |

|    | AJ                                             | AK               | AL                   | AM             | AN                      | AO                | AP                      | AQ                   | AR             | AS                      | AT | AU |
|----|------------------------------------------------|------------------|----------------------|----------------|-------------------------|-------------------|-------------------------|----------------------|----------------|-------------------------|----|----|
| 1  |                                                |                  |                      |                |                         |                   |                         |                      |                |                         |    |    |
| 2  | pared to the baseline IIR-W shown in column AA |                  |                      |                |                         |                   |                         |                      |                |                         |    |    |
| 3  |                                                |                  |                      |                |                         |                   |                         |                      |                |                         |    |    |
| 4  |                                                |                  |                      |                |                         |                   |                         |                      |                |                         |    |    |
| 5  |                                                |                  |                      |                |                         |                   |                         |                      |                |                         |    |    |
| 6  | Cohort C, 2009; N = 578                        |                  |                      |                |                         |                   | Cohort D; 2010; N = 602 |                      |                |                         |    |    |
| 7  |                                                |                  |                      |                |                         |                   |                         |                      |                |                         |    |    |
| 8  | N ruled older                                  | N ruled incident | N estimated incident | Adjusted IIR-W | IIR-W, in % of baseline | N ruled older     | N ruled incident        | N estimated incident | Adjusted IIR-W | IIR-W, in % of baseline |    |    |
| 9  |                                                |                  |                      |                |                         |                   |                         |                      |                |                         |    |    |
| 10 | 484                                            | 94               | 316                  | 0.546          | 115.9                   | 518               | 84                      | 282                  | 0.468          | 99.4                    |    |    |
| 11 | 550                                            | 28               | 223                  | 0.386          | 92.9                    | 580               | 22                      | 175                  | 0.291          | 70.1                    |    |    |
| 12 | 545                                            | 33               | 250                  | 0.432          | 97.1                    | 577               | 25                      | 189                  | 0.314          | 70.6                    |    |    |
| 13 | 496                                            | 82               | 308                  | 0.533          | 126.3                   | 540               | 62                      | 233                  | 0.387          | 91.7                    |    |    |
| 14 | 466                                            | 112              | 313                  | 0.542          | 111.5                   | 494               | 108                     | 302                  | 0.502          | 103.2                   |    |    |
| 15 | 450                                            | 128              | 330                  | 0.571          | 109.7                   | 474               | 128                     | 330                  | 0.548          | 105.3                   |    |    |
| 16 | 531                                            | 47               | 330                  | 0.570          | 135.2                   | 548               | 54                      | 379                  | 0.629          | 149.1                   |    |    |
| 17 | 484                                            | 94               | 420                  | 0.726          | 130.8                   | 498               | 104                     | 464                  | 0.771          | 138.9                   |    |    |
| 18 | 497                                            | 81               | 276                  | 0.478          | 113.9                   | 531               | 71                      | 242                  | 0.402          | 95.9                    |    |    |
| 19 | 487                                            | 91               | 291                  | 0.504          | 124.0                   | 523               | 79                      | 253                  | 0.420          | 103.3                   |    |    |
| 20 | 488                                            | 90               | 288                  | 0.499          | 123.9                   | 525               | 77                      | 247                  | 0.410          | 101.8                   |    |    |
| 21 | 504                                            | 74               | 256                  | 0.444          | 108.8                   | 535               | 67                      | 232                  | 0.386          | 94.6                    |    |    |
| 22 | 458                                            | 120              | 321                  | 0.555          | 121.3                   | 496               | 106                     | 283                  | 0.471          | 102.9                   |    |    |
| 23 | 458                                            | 120              | 321                  | 0.555          | 121.3                   | 496               | 106                     | 283                  | 0.471          | 102.9                   |    |    |
| 24 | 459                                            | 119              | 321                  | 0.555          | 121.3                   | 498               | 104                     | 280                  | 0.465          | 101.8                   |    |    |
| 25 | 457                                            | 121              | 319                  | 0.552          | 120.5                   | 493               | 109                     | 287                  | 0.477          | 104.2                   |    |    |
| 26 | 457                                            | 121              | 319                  | 0.552          | 120.5                   | 493               | 109                     | 287                  | 0.477          | 104.2                   |    |    |
| 27 | 474                                            | 104              | 298                  | 0.516          | 109.4                   | 505               | 97                      | 278                  | 0.462          | 98.0                    |    |    |
| 28 | 457                                            | 121              | 337                  | 0.582          | 111.8                   | 491               | 111                     | 309                  | 0.513          | 98.5                    |    |    |
| 29 | 501                                            | 77               | 355                  | 0.614          | 136.5                   | 538               | 64                      | 295                  | 0.490          | 108.9                   |    |    |
| 30 | 458                                            | 120              | 339                  | 0.586          | 110.9                   | 489               | 113                     | 319                  | 0.530          | 100.3                   |    |    |
| 31 | 461                                            | 117              | 338                  | 0.584          | 110.5                   | 494               | 108                     | 312                  | 0.518          | 98.0                    |    |    |
| 32 | 495                                            | 83               | 267                  | 0.462          | 98.5                    | 529               | 73                      | 235                  | 0.390          | 83.2                    |    |    |
| 33 | 497                                            | 81               | 293                  | 0.506          | 117.8                   | 537               | 65                      | 235                  | 0.390          | 90.7                    |    |    |
| 34 | 501                                            | 77               | 281                  | 0.487          | 134.7                   | 537               | 65                      | 238                  | 0.395          | 109.1                   |    |    |
| 35 | mean                                           | 93.4             | 308.3                | 0.533          | 117.0                   | mean              | 84.4                    | 278.8                | 0.463          | 101.1                   |    |    |
| 36 | SD                                             | 28.0             | 39.1                 | 0.068          | 11.4                    | SD                | 27.6                    | 58.9                 | 0.098          | 16.4                    |    |    |
| 37 | %CV                                            | 30.0             | 12.7                 | 12.7           | 9.7                     | %CV               | 32.7                    | 21.1                 | 21.1           | 16.2                    |    |    |
| 38 | lower limit 95%CI                              | 82.4             | 293.0                | 0.507          | 112.5                   | lower limit 95%CI | 73.6                    | 255.7                | 0.425          | 94.7                    |    |    |
| 39 | upper limit 95%CI                              | 104.4            | 323.7                | 0.560          | 121.5                   | upper limit 95%CI | 95.3                    | 301.9                | 0.501          | 107.5                   |    |    |
