# Supplementary material for: Simple Estimation of Incident HIV Infection Rates in Notification Cohorts Based on Window Periods of Algorithms for Evaluation of Line-Immunoassay Result Patterns
Source: PubMed Central journal article supplement (PMC3753319; doi:10.1371/journal.pone.0071662), 2013-08-26
Supplement: pone.0071662.s003.pdf [file pone.0071662.s003.pdf]

**Supporting Information S3: Changes in the performance-based incident infection rate (IIR-P) among four annual cohorts of HIV-1 notifications using the 10 best algorithms**

**A. Calculations based on the adjusted, but not weighted sensitivities S1**

| ALG #                    | Performance                 |                 | 2005/6 (Baseline); N = 748 |                  |                      |                          | 2008; N = 667 |                  |                      |                          |                       | 2009; N = 578 |                  |                          |            |                       | 2010; N = 602 |                          |                      |              |                       |
|--------------------------|-----------------------------|-----------------|----------------------------|------------------|----------------------|--------------------------|---------------|------------------|----------------------|--------------------------|-----------------------|---------------|------------------|--------------------------|------------|-----------------------|---------------|--------------------------|----------------------|--------------|-----------------------|
|                          | Adjusted Sensitivity S1 (%) | Specificity (%) | N ruled older              | N ruled incident | N estimated incident | IIR                      | N ruled older | N ruled incident | N estimated incident | IIR                      | IIR, in % of baseline | N ruled older | N ruled incident | N estimated incident     | IIR        | IIR, in % of baseline | N ruled older | N ruled incident         | N estimated incident | IIR          | IIR, in % of baseline |
| 15.1                     | 31.86                       | 95.14           | 611                        | 137              | 373                  | 0.498                    | 524           | 143              | 410                  | 0.614                    | 123.2                 | 461           | 117              | 329                      | 0.570      | 114.3                 | 494           | 108                      | 292                  | 0.484        | 97.2                  |
| 15                       | 32.60                       | 94.32           | 608                        | 140              | 362                  | 0.484                    | 523           | 144              | 394                  | 0.591                    | 122.0                 | 458           | 120              | 324                      | 0.560      | 115.7                 | 489           | 113                      | 293                  | 0.486        | 100.4                 |
| 11.2                     | 31.37                       | 94.05           | 621                        | 127              | 324                  | 0.434                    | 531           | 136              | 379                  | 0.568                    | 130.9                 | 459           | 119              | 333                      | 0.576      | 132.7                 | 498           | 104                      | 268                  | 0.446        | 102.7                 |
| 7                        | 24.59                       | 98.38           | 656                        | 92               | 348                  | 0.465                    | 558           | 109              | 427                  | 0.641                    | 137.9                 | 497           | 81               | 312                      | 0.540      | 116.1                 | 531           | 71                       | 267                  | 0.443        | 95.3                  |
| 13                       | 30.03                       | 95.00           | 625                        | 123              | 342                  | 0.457                    | 538           | 129              | 382                  | 0.573                    | 125.3                 | 474           | 104              | 300                      | 0.519      | 113.5                 | 505           | 97                       | 267                  | 0.444        | 97.1                  |
| 12.1                     | 31.44                       | 93.38           | 619                        | 129              | 320                  | 0.428                    | 528           | 139              | 382                  | 0.573                    | 133.8                 | 458           | 120              | 329                      | 0.570      | 133.1                 | 495           | 107                      | 271                  | 0.449        | 105.0                 |
| 9                        | 23.74                       | 98.38           | 660                        | 88               | 343                  | 0.459                    | 560           | 107              | 435                  | 0.652                    | 142.2                 | 504           | 74               | 292                      | 0.506      | 110.2                 | 535           | 67                       | 259                  | 0.430        | 93.7                  |
| 4.1                      | 34.59                       | 91.89           | 597                        | 151              | 341                  | 0.456                    | 522           | 145              | 343                  | 0.515                    | 112.9                 | 450           | 128              | 306                      | 0.530      | 116.2                 | 474           | 128                      | 299                  | 0.497        | 108.9                 |
| 11.1                     | 31.37                       | 93.37           | 620                        | 128              | 317                  | 0.424                    | 531           | 136              | 371                  | 0.556                    | 131.3                 | 458           | 120              | 330                      | 0.571      | 134.8                 | 496           | 106                      | 267                  | 0.444        | 104.7                 |
| 8.1                      | 25.17                       | 96.76           | 654                        | 94               | 318                  | 0.425                    | 554           | 113              | 417                  | 0.625                    | 146.9                 | 488           | 90               | 325                      | 0.562      | 132.2                 | 525           | 77                       | 262                  | 0.436        | 102.4                 |
| <i>mean</i>              | <b>29.68</b>                | <b>95.07</b>    | <i>mean</i>                | <b>339</b>       | <b>0.453</b>         | <i>mean</i>              | <b>394</b>    | <b>0.591</b>     | <b>130.6</b>         | <i>mean</i>              | <b>318</b>            | <b>0.550</b>  | <b>121.9</b>     | <i>mean</i>              | <b>274</b> | <b>0.456</b>          | <b>100.7</b>  | <i>mean</i>              | <b>274</b>           | <b>0.456</b> | <b>100.7</b>          |
| <i>SD</i>                | 3.77                        | 2.17            | <i>SD</i>                  | 19               | 0.025                | <i>SD</i>                | 28            | 0.042            | 10.2                 | <i>SD</i>                | 14                    | 0.025         | 9.9              | <i>SD</i>                | 14         | 0.024                 | 4.9           | <i>SD</i>                | 14                   | 0.024        | 4.9                   |
| <i>lower limit 95%CI</i> | 27.34                       | 93.72           | <i>lower limit 95%CI</i>   | 327              | 0.437                | <i>lower limit 95%CI</i> | 377           | 0.565            | 124.3                | <i>lower limit 95%CI</i> | 309                   | 0.535         | 115.7            | <i>lower limit 95%CI</i> | 266        | 0.441                 | 97.7          | <i>lower limit 95%CI</i> | 266                  | 0.441        | 97.7                  |
| <i>upper limit 95%CI</i> | 32.01                       | 96.41           | <i>upper limit 95%CI</i>   | 351              | 0.469                | <i>upper limit 95%CI</i> | 412           | 0.617            | 136.9                | <i>upper limit 95%CI</i> | 327                   | 0.566         | 128.0            | <i>upper limit 95%CI</i> | 283        | 0.471                 | 103.7         | <i>upper limit 95%CI</i> | 283                  | 0.471        | 103.7                 |

**B. Calculations based on the adjusted and weighted sensitivities S2**

| ALG #                    | Performance                 |                 | 2005/6 (Baseline); N = 748 |                  |                      |                          | 2008; N = 667 |                  |                      |                          |                       | 2009; N = 578 |                  |                          |            |                       | 2010; N = 602 |                          |                      |              |                       |
|--------------------------|-----------------------------|-----------------|----------------------------|------------------|----------------------|--------------------------|---------------|------------------|----------------------|--------------------------|-----------------------|---------------|------------------|--------------------------|------------|-----------------------|---------------|--------------------------|----------------------|--------------|-----------------------|
|                          | Adjusted Sensitivity S2 (%) | Specificity (%) | N ruled older              | N ruled incident | N estimated incident | IIR                      | N ruled older | N ruled incident | N estimated incident | IIR                      | IIR, in % of baseline | N ruled older | N ruled incident | N estimated incident     | IIR        | IIR, in % of baseline | N ruled older | N ruled incident         | N estimated incident | IIR          | IIR, in % of baseline |
| 15.1                     | 52.94                       | 95.14           | 611                        | 137              | 209                  | 0.280                    | 524           | 143              | 230                  | 0.345                    | 123.2                 | 461           | 117              | 185                      | 0.320      | 114.3                 | 494           | 108                      | 164                  | 0.272        | 97.2                  |
| 15                       | 53.57                       | 94.32           | 608                        | 140              | 204                  | 0.272                    | 523           | 144              | 222                  | 0.332                    | 122.0                 | 458           | 120              | 182                      | 0.315      | 115.7                 | 489           | 113                      | 165                  | 0.273        | 100.4                 |
| 11.2                     | 52.60                       | 94.05           | 621                        | 127              | 177                  | 0.236                    | 531           | 136              | 206                  | 0.310                    | 130.9                 | 459           | 119              | 181                      | 0.314      | 132.7                 | 498           | 104                      | 146                  | 0.243        | 102.7                 |
| 7                        | 45.15                       | 98.38           | 656                        | 92               | 184                  | 0.245                    | 558           | 109              | 226                  | 0.338                    | 137.9                 | 497           | 81               | 165                      | 0.285      | 116.1                 | 531           | 71                       | 141                  | 0.234        | 95.3                  |
| 13                       | 50.87                       | 95.00           | 625                        | 123              | 187                  | 0.249                    | 538           | 129              | 209                  | 0.313                    | 125.3                 | 474           | 104              | 164                      | 0.283      | 113.5                 | 505           | 97                       | 146                  | 0.242        | 97.1                  |
| 12.1                     | 52.76                       | 93.38           | 619                        | 129              | 172                  | 0.230                    | 528           | 139              | 206                  | 0.308                    | 133.8                 | 458           | 120              | 177                      | 0.306      | 133.1                 | 495           | 107                      | 146                  | 0.242        | 105.0                 |
| 9                        | 43.91                       | 98.38           | 660                        | 88               | 179                  | 0.240                    | 560           | 107              | 227                  | 0.341                    | 142.2                 | 504           | 74               | 153                      | 0.264      | 110.2                 | 535           | 67                       | 135                  | 0.225        | 93.7                  |
| 4.1                      | 55.08                       | 91.89           | 597                        | 151              | 192                  | 0.257                    | 522           | 145              | 194                  | 0.290                    | 112.9                 | 450           | 128              | 173                      | 0.299      | 116.2                 | 474           | 128                      | 169                  | 0.280        | 108.9                 |
| 11.1                     | 52.60                       | 93.37           | 620                        | 128              | 171                  | 0.228                    | 531           | 136              | 200                  | 0.299                    | 131.3                 | 458           | 120              | 178                      | 0.307      | 134.8                 | 496           | 106                      | 144                  | 0.239        | 104.7                 |
| 8.1                      | 45.81                       | 96.76           | 654                        | 94               | 164                  | 0.219                    | 554           | 113              | 215                  | 0.322                    | 146.9                 | 488           | 90               | 167                      | 0.290      | 132.2                 | 525           | 77                       | 135                  | 0.224        | 102.4                 |
| <i>mean</i>              | <b>50.53</b>                | <b>95.07</b>    | <i>mean</i>                | <b>184</b>       | <b>0.246</b>         | <i>mean</i>              | <b>213</b>    | <b>0.320</b>     | <b>130.6</b>         | <i>mean</i>              | <b>172</b>            | <b>0.298</b>  | <b>121.9</b>     | <i>mean</i>              | <b>149</b> | <b>0.247</b>          | <b>100.7</b>  | <i>mean</i>              | <b>149</b>           | <b>0.247</b> | <b>100.7</b>          |
| <i>SD</i>                | 4.01                        | 2.17            | <i>SD</i>                  | 15               | 0.019                | <i>SD</i>                | 13            | 0.019            | 10.2                 | <i>SD</i>                | 10                    | 0.018         | 9.9              | <i>SD</i>                | 12         | 0.020                 | 4.9           | <i>SD</i>                | 12                   | 0.020        | 4.9                   |
| <i>lower limit 95%CI</i> | 48.05                       | 93.72           | <i>lower limit 95%CI</i>   | 175              | 0.234                | <i>lower limit 95%CI</i> | 206           | 0.308            | 124.3                | <i>lower limit 95%CI</i> | 166                   | 0.287         | 115.7            | <i>lower limit 95%CI</i> | 141        | 0.235                 | 97.7          | <i>lower limit 95%CI</i> | 141                  | 0.235        | 97.7                  |
| <i>upper limit 95%CI</i> | 53.01                       | 96.41           | <i>upper limit 95%CI</i>   | 193              | 0.258                | <i>upper limit 95%CI</i> | 221           | 0.331            | 136.9                | <i>upper limit 95%CI</i> | 179                   | 0.309         | 128.0            | <i>upper limit 95%CI</i> | 157        | 0.260                 | 103.7         | <i>upper limit 95%CI</i> | 157                  | 0.260        | 103.7                 |

**C. Calculations based on the adjusted and weighted sensitivities S3**

| ALG #                    | Performance                 |                 | 2005/6 (Baseline); N = 748 |                  |                      |                          | 2008; N = 667 |                  |                      |                          |                       | 2009; N = 578 |                  |                          |            |                       | 2010; N = 602 |                          |                      |              |                       |
|--------------------------|-----------------------------|-----------------|----------------------------|------------------|----------------------|--------------------------|---------------|------------------|----------------------|--------------------------|-----------------------|---------------|------------------|--------------------------|------------|-----------------------|---------------|--------------------------|----------------------|--------------|-----------------------|
|                          | Adjusted Sensitivity S3 (%) | Specificity (%) | N ruled older              | N ruled incident | N estimated incident | IIR                      | N ruled older | N ruled incident | N estimated incident | IIR                      | IIR, in % of baseline | N ruled older | N ruled incident | N estimated incident     | IIR        | IIR, in % of baseline | N ruled older | N ruled incident         | N estimated incident | IIR          | IIR, in % of baseline |
| 15.1                     | 39.61                       | 95.14           | 611                        | 137              | 290                  | 0.387                    | 524           | 143              | 318                  | 0.477                    | 123.2                 | 461           | 117              | 256                      | 0.443      | 114.3                 | 494           | 108                      | 227                  | 0.376        | 97.2                  |
| 15                       | 40.22                       | 94.32           | 608                        | 140              | 282                  | 0.377                    | 523           | 144              | 307                  | 0.461                    | 122.0                 | 458           | 120              | 252                      | 0.437      | 115.7                 | 489           | 113                      | 228                  | 0.379        | 100.4                 |
| 11.2                     | 39.20                       | 94.05           | 621                        | 127              | 248                  | 0.332                    | 531           | 136              | 290                  | 0.434                    | 130.9                 | 459           | 119              | 254                      | 0.440      | 132.7                 | 498           | 104                      | 205                  | 0.341        | 102.7                 |
| 7                        | 32.38                       | 98.38           | 656                        | 92               | 260                  | 0.347                    | 558           | 109              | 319                  | 0.479                    | 137.9                 | 497           | 81               | 233                      | 0.403      | 116.1                 | 531           | 71                       | 199                  | 0.331        | 95.3                  |
| 13                       | 37.65                       | 95.00           | 625                        | 123              | 262                  | 0.350                    | 538           | 129              | 293                  | 0.439                    | 125.3                 | 474           | 104              | 230                      | 0.398      | 113.5                 | 505           | 97                       | 205                  | 0.340        | 97.1                  |
| 12.1                     | 39.30                       | 93.38           | 619                        | 129              | 243                  | 0.325                    | 528           | 139              | 290                  | 0.435                    | 133.8                 | 458           | 120              | 250                      | 0.433      | 133.1                 | 495           | 107                      | 205                  | 0.341        | 105.0                 |
| 9                        | 31.42                       | 98.38           | 660                        | 88               | 255                  | 0.340                    | 560           | 107              | 323                  | 0.484                    | 142.2                 | 504           | 74               | 217                      | 0.375      | 110.2                 | 535           | 67                       | 192                  | 0.319        | 93.7                  |
| 4.1                      | 42.05                       | 91.89           | 597                        | 151              | 266                  | 0.356                    | 522           | 145              | 268                  | 0.402                    | 112.9                 | 450           | 128              | 239                      | 0.414      | 116.2                 | 474           | 128                      | 233                  | 0.388        | 108.9                 |
| 11.1                     | 39.20                       | 93.37           | 620                        | 128              | 241                  | 0.322                    | 531           | 136              | 282                  | 0.422                    | 131.3                 | 458           | 120              | 251                      | 0.434      | 134.8                 | 496           | 106                      | 203                  | 0.337        | 104.7                 |
| 8.1                      | 33.09                       | 96.76           | 654                        | 94               | 234                  | 0.312                    | 554           | 113              | 306                  | 0.459                    | 146.9                 | 488           | 90               | 239                      | 0.413      | 132.2                 | 525           | 77                       | 193                  | 0.320        | 102.4                 |
| <i>mean</i>              | <b>37.41</b>                | <b>95.07</b>    | <i>mean</i>                | <b>258</b>       | <b>0.345</b>         | <i>mean</i>              | <b>300</b>    | <b>0.449</b>     | <b>130.6</b>         | <i>mean</i>              | <b>242</b>            | <b>0.419</b>  | <b>121.9</b>     | <i>mean</i>              | <b>209</b> | <b>0.347</b>          | <b>100.7</b>  | <i>mean</i>              | <b>209</b>           | <b>0.347</b> | <b>100.7</b>          |
| <i>SD</i>                | 3.72                        | 2.17            | <i>SD</i>                  | 18               | 0.024                | <i>SD</i>                | 18            | 0.027            | 10.2                 | <i>SD</i>                | 13                    | 0.022         | 9.9              | <i>SD</i>                | 15         | 0.025                 | 4.9           | <i>SD</i>                | 15                   | 0.025        | 4.9                   |
| <i>lower limit 95%CI</i> | 35.11                       | 93.72           | <i>lower limit 95%CI</i>   | 247              | 0.330                | <i>lower limit 95%CI</i> | 288           | 0.432            | 124.3                | <i>lower limit 95%CI</i> | 234                   | 0.405         | 115.7            | <i>lower limit 95%CI</i> | 200        | 0.332                 | 97.7          | <i>lower limit 95%CI</i> | 200                  | 0.332        | 97.7                  |
| <i>upper limit 95%CI</i> | 39.71                       | 96.41           | <i>upper limit 95%CI</i>   | 269              | 0.360                | <i>upper limit 95%CI</i> | 311           | 0.466            | 136.9                | <i>upper limit 95%CI</i> | 250                   | 0.433         | 128.0            | <i>upper limit 95%CI</i> | 218        | 0.363                 | 103.7         | <i>upper limit 95%CI</i> | 218                  | 0.363        | 103.7                 |
